# Supplementary material for: Targeting CD47 and Autophagy Elicited Enhanced Antitumor Effects in Non–Small Cell Lung Cancer
Source: Oxford University Press journal article supplement (doi:10.1158/2326-6066.cir-16-0398), 2017-03-28
Supplement: 23266066cir160398-sup-176690_2_supp_3913861_nnbnzn.docx [file 23266066cir160398-sup-176690_2_supp_3913861_nnbnzn.docx]

**Supplementary Information**

**Targeting CD47 and autophagy elicited enhanced anti-tumor effects in non-small cell lung cancer**

Xuyao Zhang, Jiajun Fan, Shaofei Wang, Yubin Li, Yichen Wang, Song Li, Jingyun Luan, Ziyu Wang, Ping Song, Qicheng Chen, Wenzhi Tian, Dianwen Ju

**Supplementary Data:**

Supplementary Figure S1.

Supplementary Figure S2.

Supplementary Figure S3.

Supplementary Figure S4.

Supplementary Figure S5.

Supplementary Figure S6.

Supplementary Figure S7.

Supplementary Figure S8.

Supplementary Figure S9.

Supplementary Figure S10.

Supplementary Figure S11.

Supplementary Figure S12.


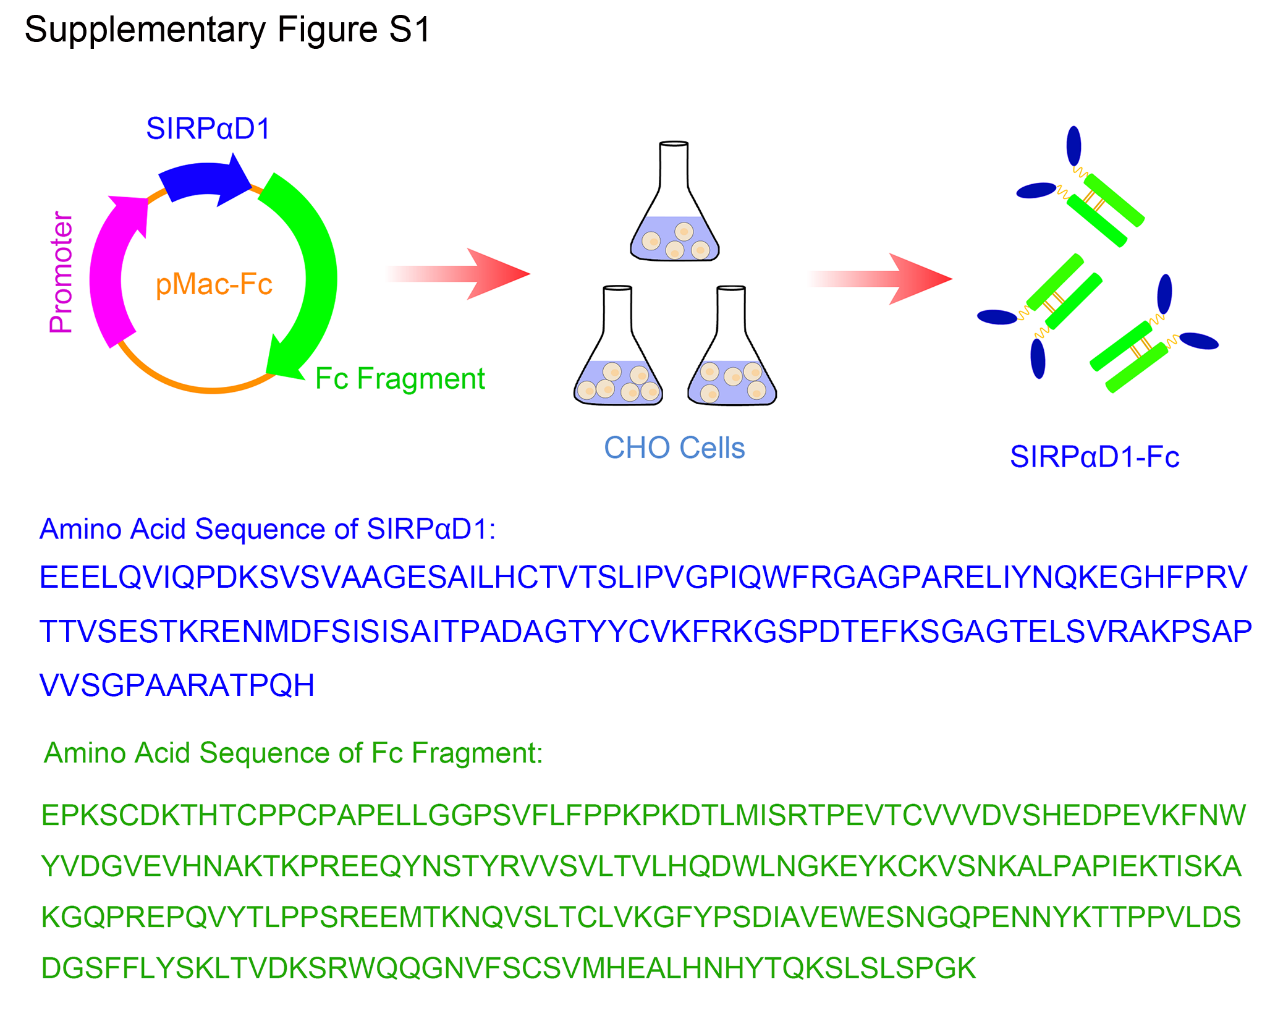


**Supplementary Figure S1. The designed amino acid sequence of SIRPαD1-Fc.**


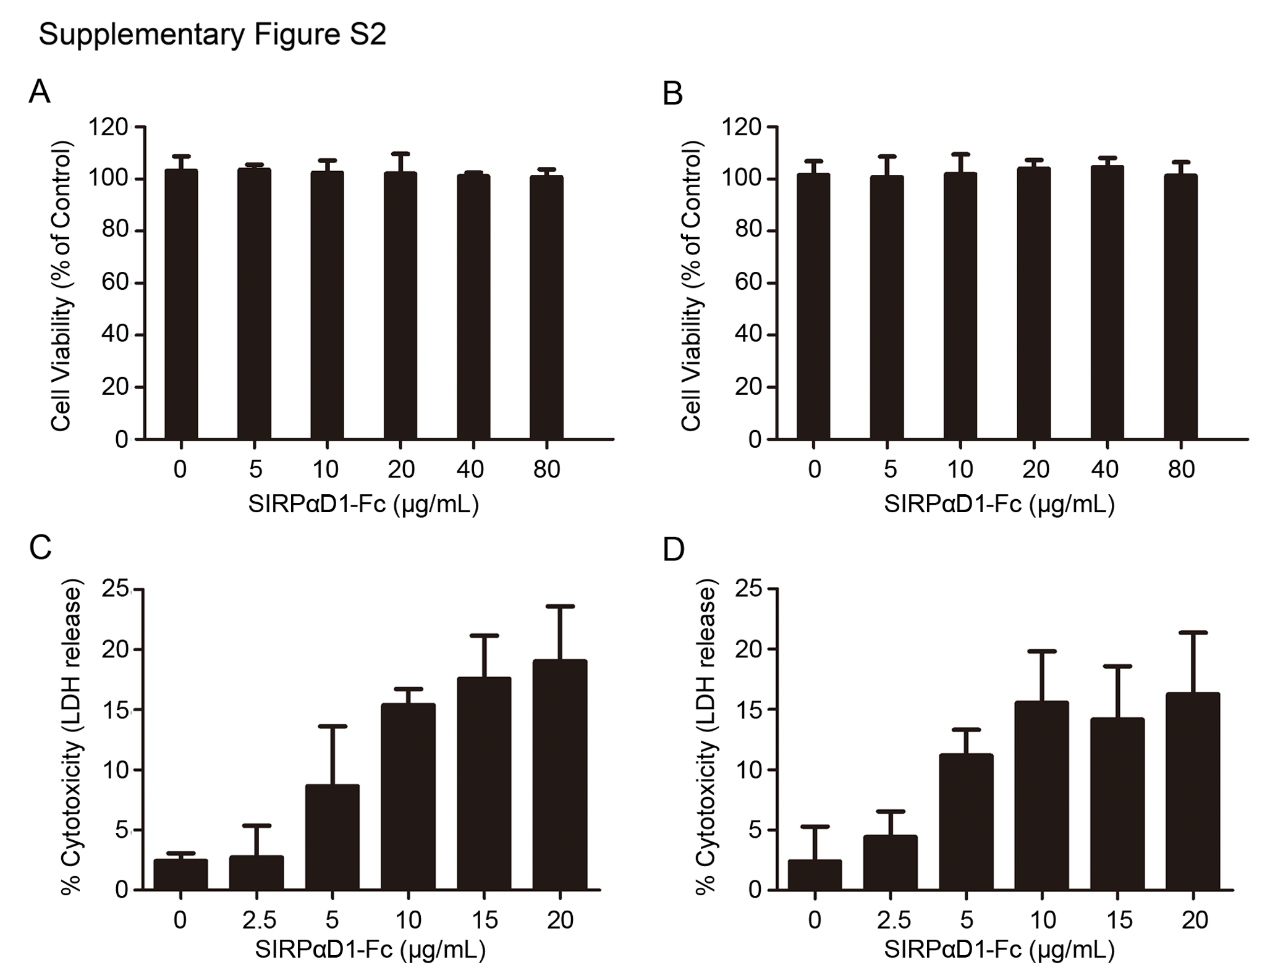


**Supplementary Figure S2. Macrophage-mediated cytotoxicity in NSCLC cells after treatment with SIRPαD1-Fc.**

(**A** and **B**) Without macrophages, SIRPαD1-Fc had a negligible effect on cell viability of A549 cells and NCI-H1975 cells from 0 to 80 μg/mL with a 24 h incubation.

(**C** and **D**) After exposed to SIRPαD1-Fc, LDH release represented cell cytotoxicity in A549 cells and NCI-H1975 cells mediated by macrophages at the indicated effector: target cell ratio of 20:1 for 6 h.


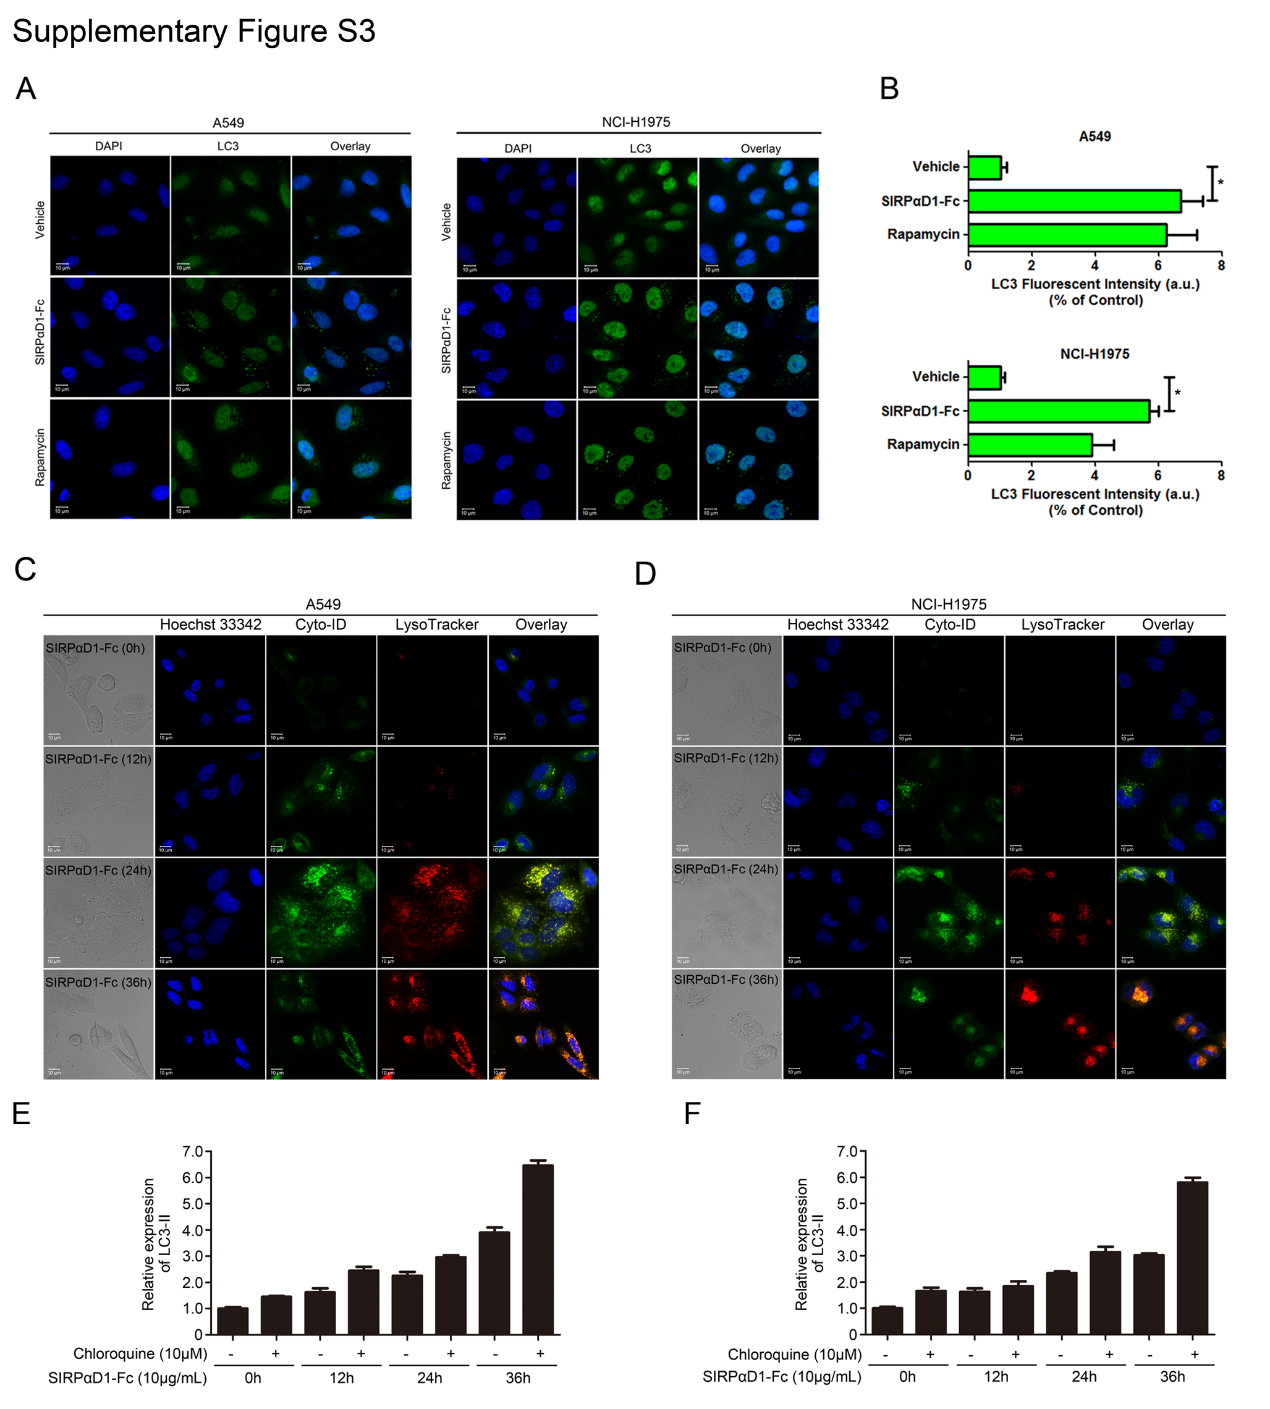


**Supplementary Figure S3.** **SIRPαD1-Fc induced accumulation of autophagosomes and triggered autophagic flux in NSCLC cells**.

(**A** and **B**) Immunofluorescent staining was employed to confirm the accumulation of autophagosomes in A549 cells and NCI-H1975 cells after SIRPαD1-Fc (10 μg/mL) treatment. Relative fluoresent spot intensity was quantified by ImageJ software and the values of control were set to 1.0. The data were presented as means ± SD of three independent experiments.

(**C and D**) Representative fluorescence images of A549 cells and NCI-H1975 cells co-stained with Cyto-ID® and LysoTracker® after exposed to SIRPαD1-Fc for the indicated time.

(**E and F**) Inhibition of autophagic flux by chloroquine resulted in further accumulation of SIRPαD1-Fc induced LC3-II. Densitometric values were quantified by Image J software and presented as means ± SD of three independent experiments.


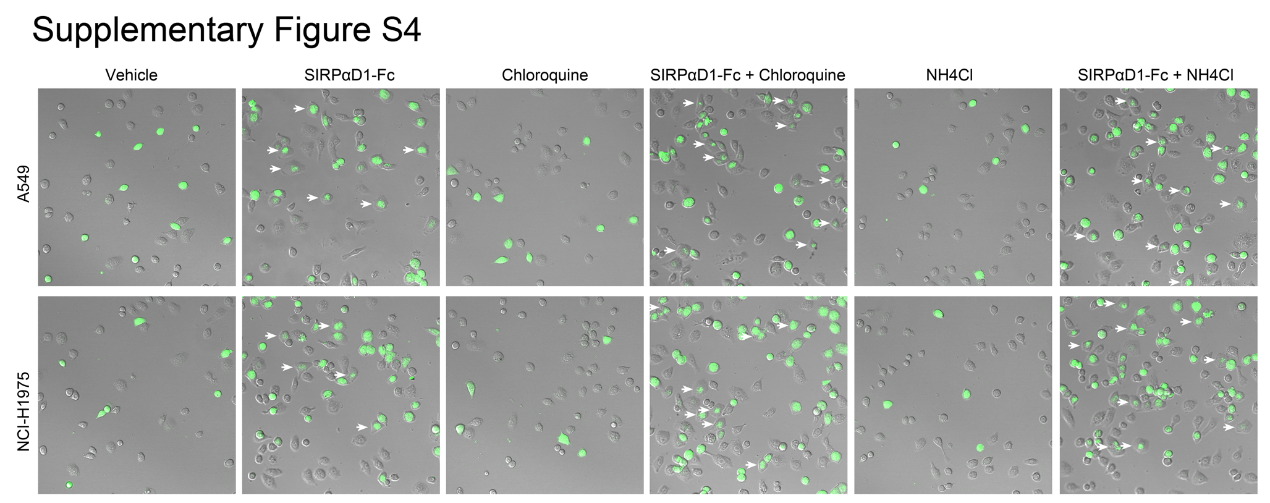


**Supplementary Figure S4. Inhibiting autophagy enhanced macrophage-mediated phagocytosis**.

Representative images of macrophages phagocytosing NSCLC cells following treatment with indicated SIRPαD1-Fc with or without autophagy inhibitors for 2 h. Arrows point to phagocytosed tumor cells.

**
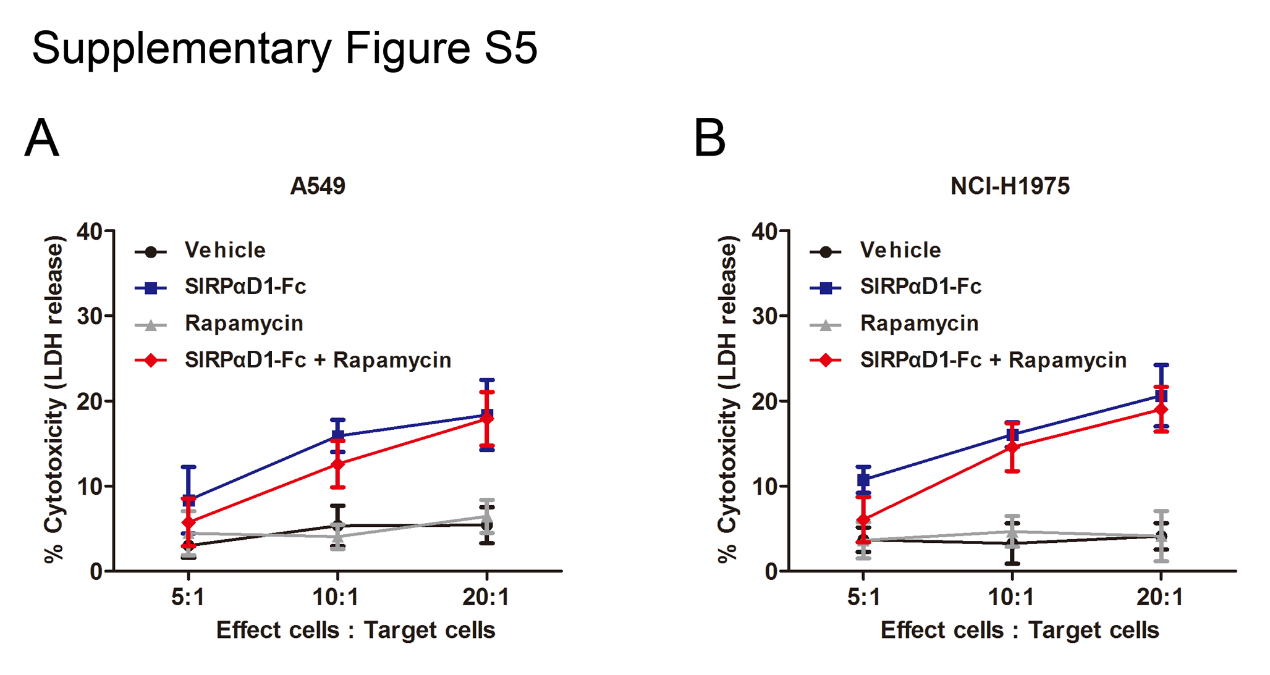
**

**Supplementary Figure S5. Rapamycin exhibited negligible effect on** **the** **cytotoxicity mediated by macrophage against NSCLC cells**.

(**A** and **B**) LDH release represented cell cytotoxicity in A549 cells and NCI-H1975 cells mediated by macrophages following the treatment with SIRPαD1-Fc in combination with or without autophagy inducer rapamycin at the indicated effector: target cell ratio for 6 h.

**
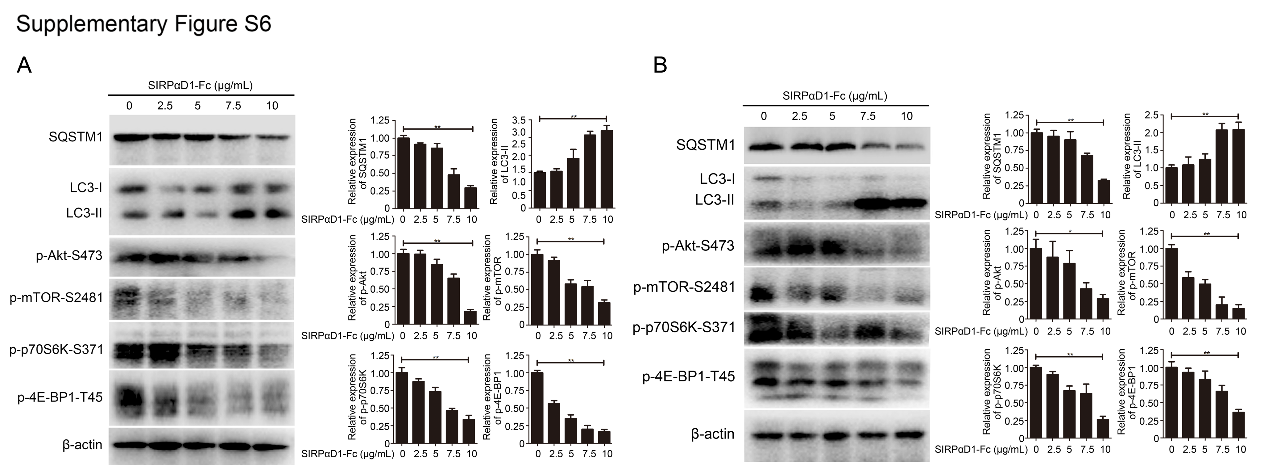
**

**Supplementary Figure S6. Inactivation of Akt/mTOR signaling pathway after NSCLC cells treated with SIRPαD1-Fc**

(**A**)A549 cells were exposed to various concentration of SIRPαD1-Fc (0, 2.5, 5, 7.5 10 μg/mL) for 24 h and whole cell lysates were analyzed by western blot to examine the expression of SQSTM1, LC3, p-Akt, p-mTOR, p-p70S6K, and p-4E-BP1. Densitometric values were quantified by Image J software and normalized to control. The values of control were set to 1.0. The data were presented as means ± SD of three independent experiments. (Student’s t-test, ** *p* < 0.01).

(**B**)NCI-H1975 cells were incubated with SIRPαD1-Fc (0, 2.5, 5, 7.5 10 μg/mL) for 24 h and whole cell lysates were analyzed by western blot to examine the expression of SQSTM1, LC3, p-Akt, p-mTOR, p-p70S6K, and p-4E-BP1. β-actin was provided as a loading control. Densitometric values were quantified as described in (**A**).

**
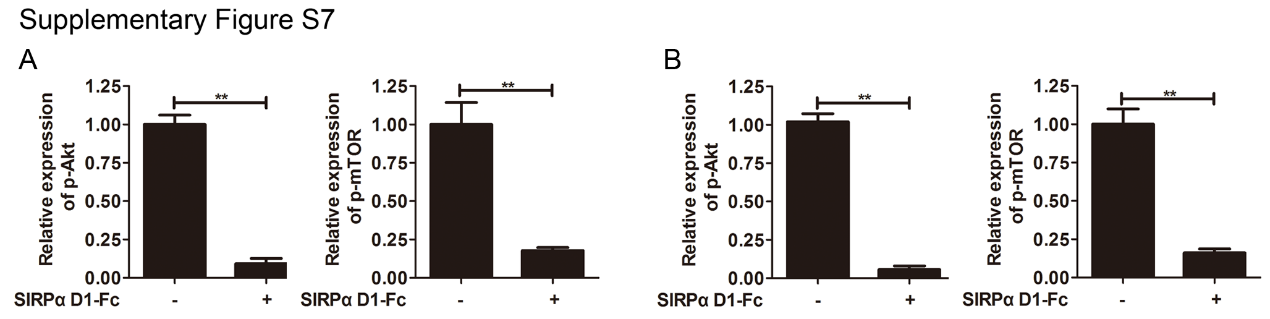
**

**Supplementary Figure S7. Inactivation of Akt/mTOR signaling pathway *in vivo* after SIRPαD1-Fc treatment**.

(**A** and **B**) The protein level of phosphorylated Akt and mTOR was detected in A549 xenograft tumors and NCI-H1975 xenograft tumors after SIRPαD1-Fc treatment.


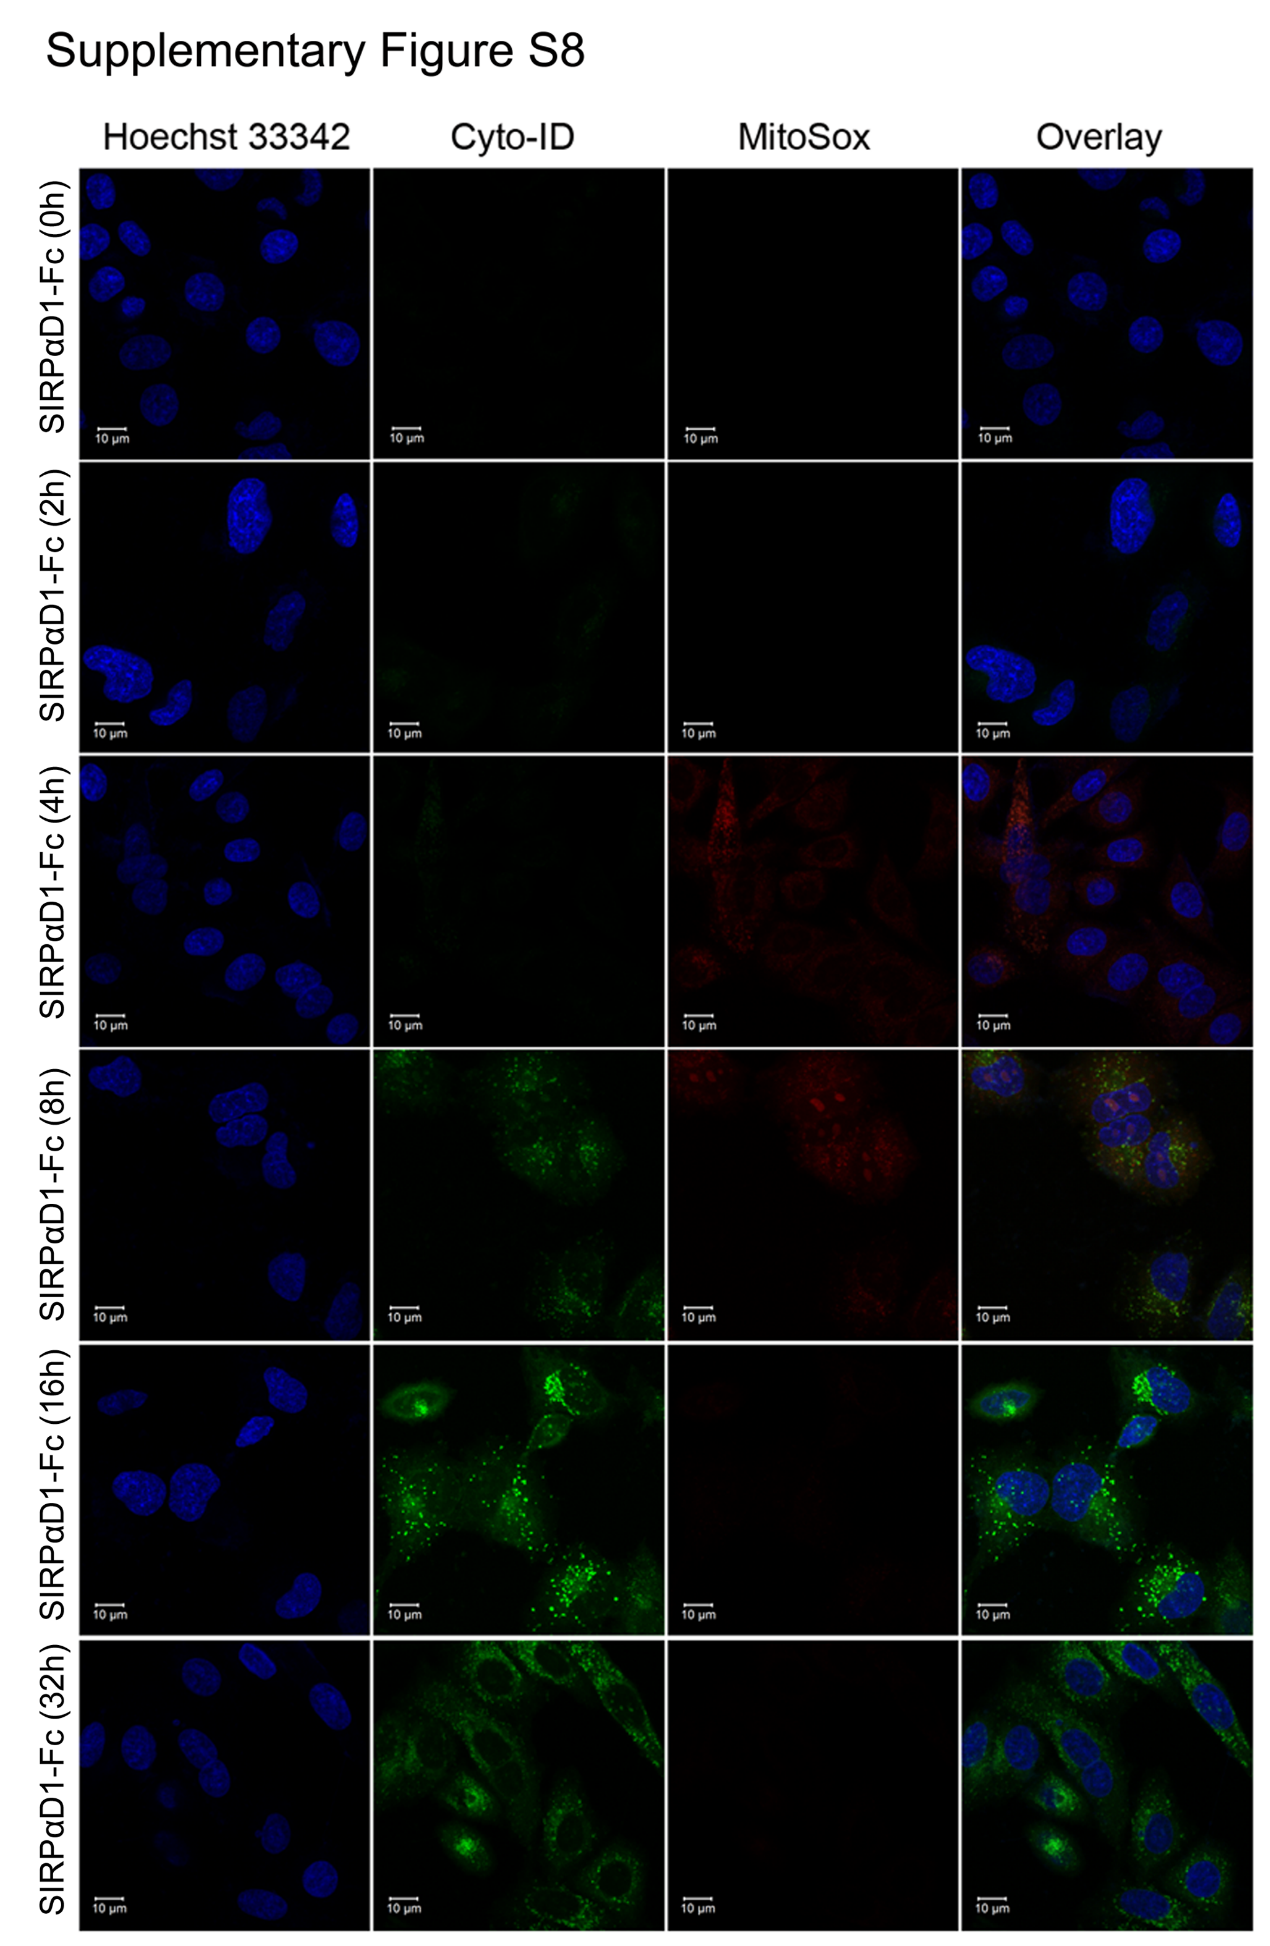


**Supplementary Figure S8.** Representative fluorescence images of A549 cells co-stained with Cyto-ID ® green dye and MitoSoxTM red dye after exposed to SIRPαD1-Fc for the indicated time.


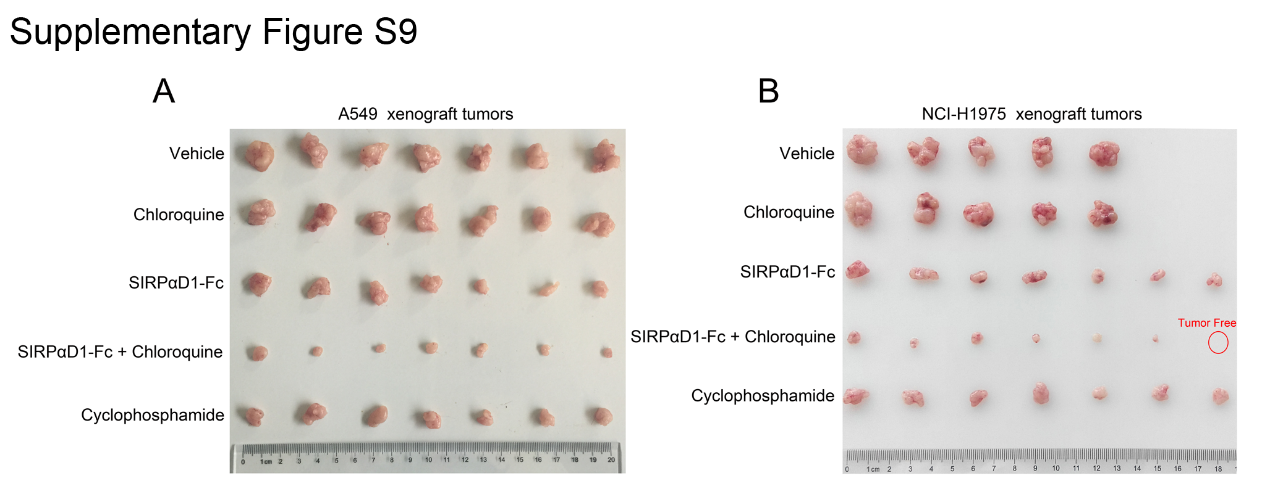


**Supplementary Figure S9.** Photos of NSCLC xenograft tumors after treatment with SIRPαD1-Fc and/or chloroquine. (**A**) Photos of A549 xenograft tumors. (**B**) Photos of NCI-H1975 xenograft tumors.


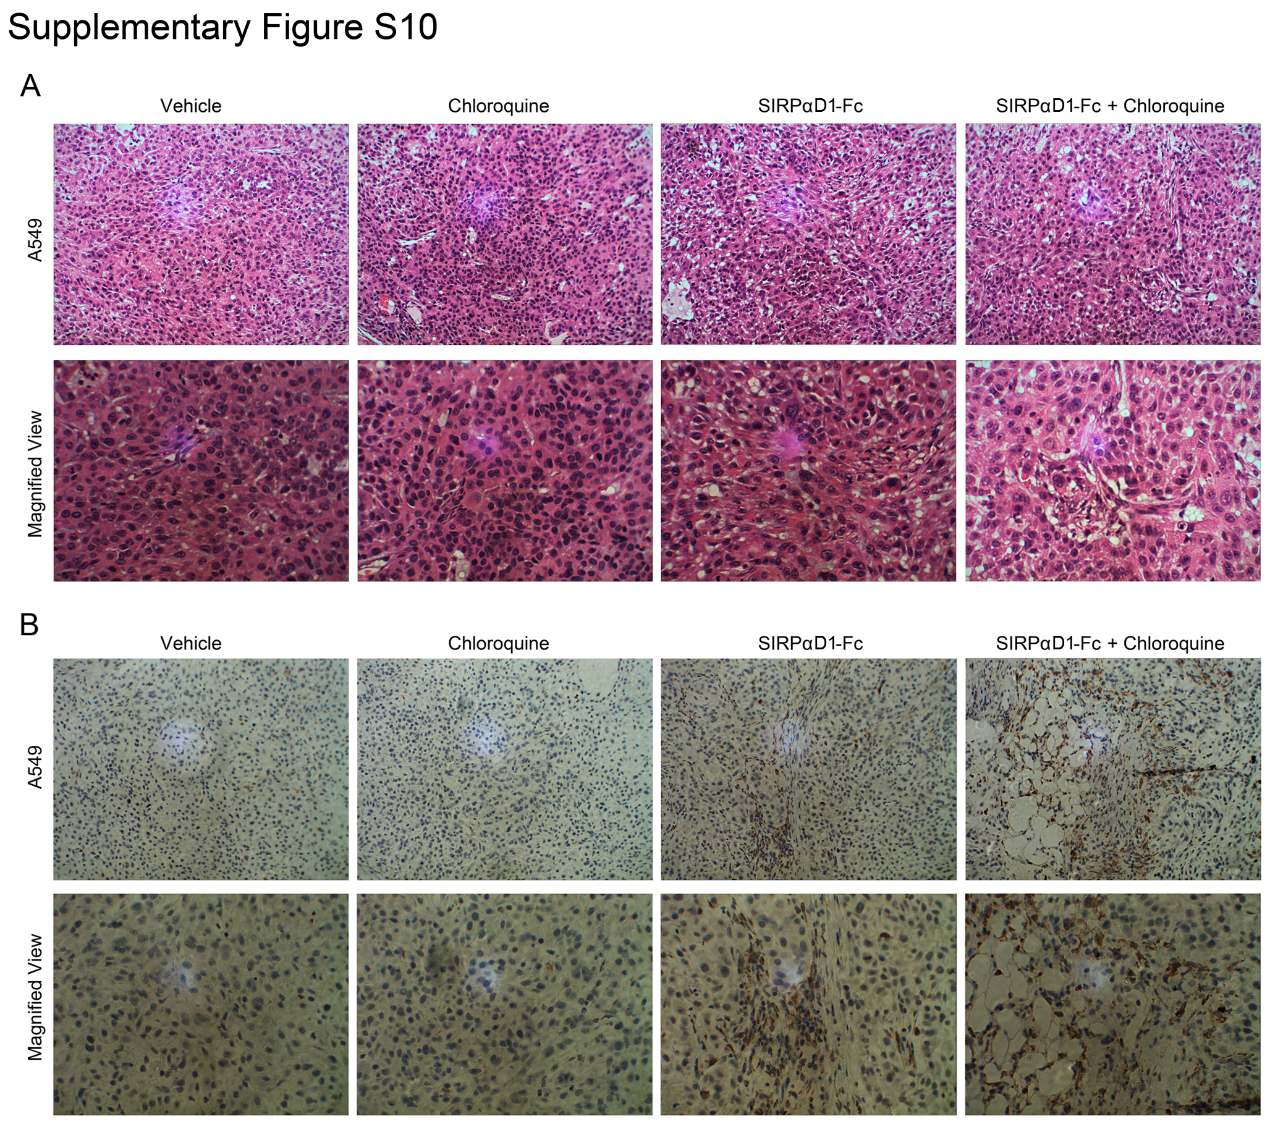


**Supplementary Figure S10.** **Analysis of SIRPαD1-Fc-treated A549 xenograft tumor tissues by TEM, H&E and immunohistochemistry staining.**

(**A**)Representative H&E images ofA549 xenograft tumors treated with SIRPαD1-Fc in combination with or without chloroquine.

(**B**) Representative images of immunohistochemistry CD68 staining of A549 xenograft tumors treated with SIRPαD1-Fc in combination with or without chloroquine.


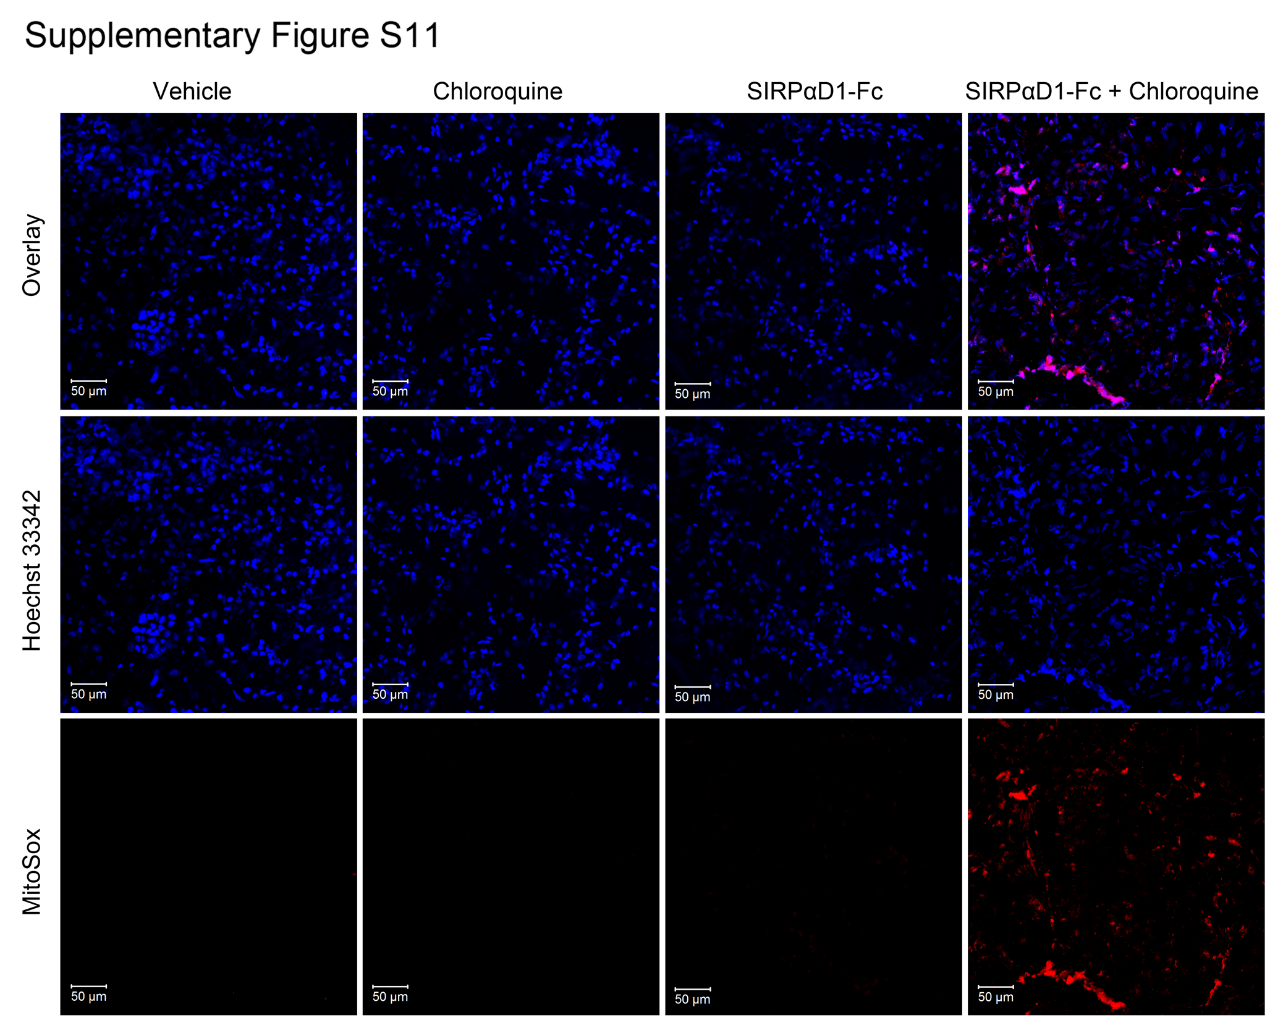


**Supplementary Figure S11.** **Representative fluorescence images of ROS formation in NCI-H1975 xenograft tumors**.

NCI-H1975 xenograft tissues co-stained with Hoechst 33342 blue dye and MitoSoxTM red dye after co-treatment with SIRPαD1-Fc and chloroquine.


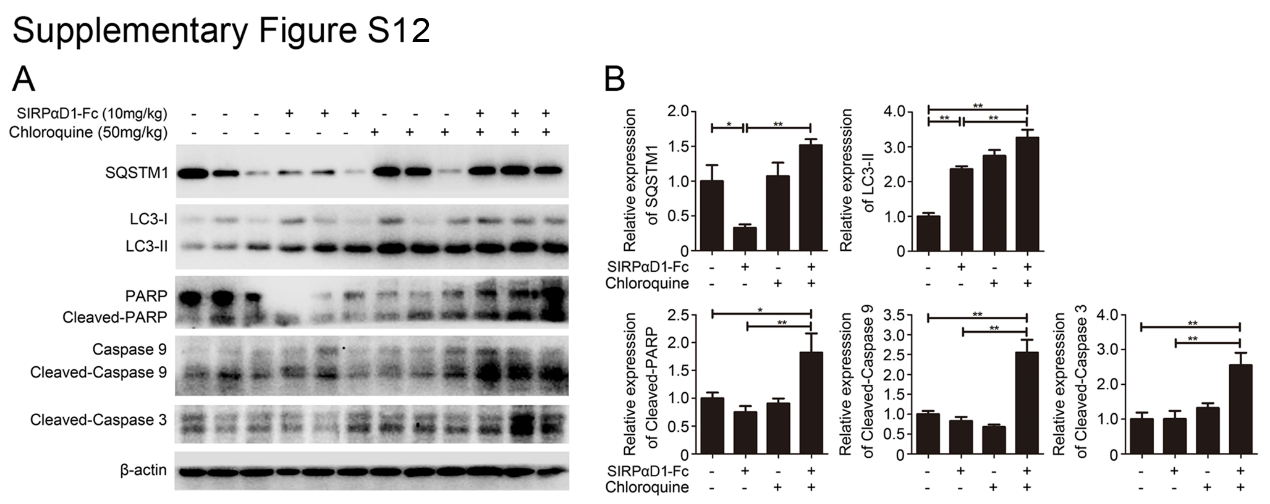


**Supplementary Figure S12. Simultaneously targeting CD47 and autophagy activated apoptosis-related pathways *in vivo*.**

(**A**) After treatment with SIRPαD1-Fc in combination with or without chloroquine for 22 d, A549 xenograft mice were sacrificed. Total tissue lysates of independent tumor tissue samples were analyzed by western blot to examine the expression of SQSTM1, LC3, PARP, Caspase 9, and Caspase 3. β-actin was provided as a loading control.

(**B**)Densitometric values of protein expression of all independent tumor tissue samples in each group were quantified by Image J software and normalized to control. The values of control were set to 1.0. The data were presented as means ± SD of three independent experiments (Student’s t-test, * *p* < 0.05, ** *p* < 0.01).
